# Supplementary material for: Disruption of Mbd5 in mice causes neuronal functional deficits and neurobehavioral abnormalities consistent with 2q23.1 microdeletion syndrome
Source: PubMed Central journal article supplement (PMC4154129; doi:10.15252/emmm.201404044), 2014-07-07
Supplement: emmm0006-1003-sd1.pdf [file emmm0006-1003-sd1.pdf]

Supplemental figures for "Disruption of Mbd5 in mice causes neuronal functional deficits and neurobehavioral abnormalities consistent with 2q23.1 Microdeletion Syndrome."

**Content:**

**Figure S1.** The  $\beta$  geo gene-trap cassette from pU-21B vector was inserted into the second intron of *Mbd5*

**Figure S2.** Pattern of expression of mouse Mbd5

**Figure S3.** Reduced abdominal fat and nasal bone deformation in *Mbd5*<sup>+/<sup>GT</sup> mice</sup>

**Figure S4.** *Mbd5*<sup>+/<sup>GT</sup> mice have normal locomotor activity and anxiety-like behavior</sup>

**Figure S5.** Increased frequency of self-grooming and normal olfaction in *Mbd5*<sup>+/<sup>GT</sup> mice</sup>

**Figure S6.** Localization of transfected Mbd5 in mouse NIH-3T3 cells

**Supplemental Table 1.** Sequences of the primers used in the manuscript

**Supplemental figure legends**

**Fig S1**

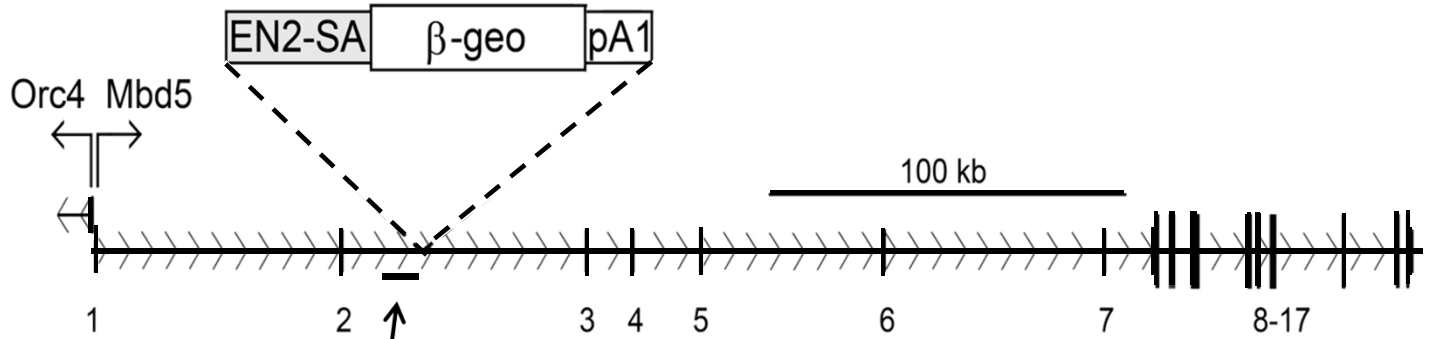

5'Race product from Gene trap allele: *Mbd5*<sup>Gt(Ayu21-B205)</sup>Imeg

Trap vector: pU-21B Size 9399 bp

Vector integration sites were determined by performing BLAST analysis of the 5'RACE using the UCSC database: (chr2:49,081,787).

Result of the 5'RACE sequence: underlined align with the *Mbd5* gene, italic sequence align with the trap vector.

```
cactattattgtgtgagttgtagtggttctttattagagttccttaatgaatgtgggatgcccttgca  
agcacagatattcacaattgagagttcatcttggagattttcttttagtgagatgaagtgcacctcctgt  
ctttttgataactttgggttgggaagtgattttatattagaatggctactccagctgtttctcagagtg  
ttgcttggaattgtttccagcctttcctctgaggtagggtatgtctttgtccctgaggtgggttctgt  
atgtaggaaaatgttcagtcctgtttatgtagccaggctgttagtctaagtcttttattggggaattgagtc  
cattgatattaagagataactaaggaaaagtgagtggtgcttctattttgttgttagagtcttgtcctaga  
gcctcactggccaggtgtaagccaggctcggtgggtgccgagccctgctccctcatcctcagcatggat  
gtgaagaggactgtatggcgtgagggtgtgtgtgaccgtgggtacacttaaacaccgggttggatc  
tgc  
at
```

**Fig S2**

**A)**

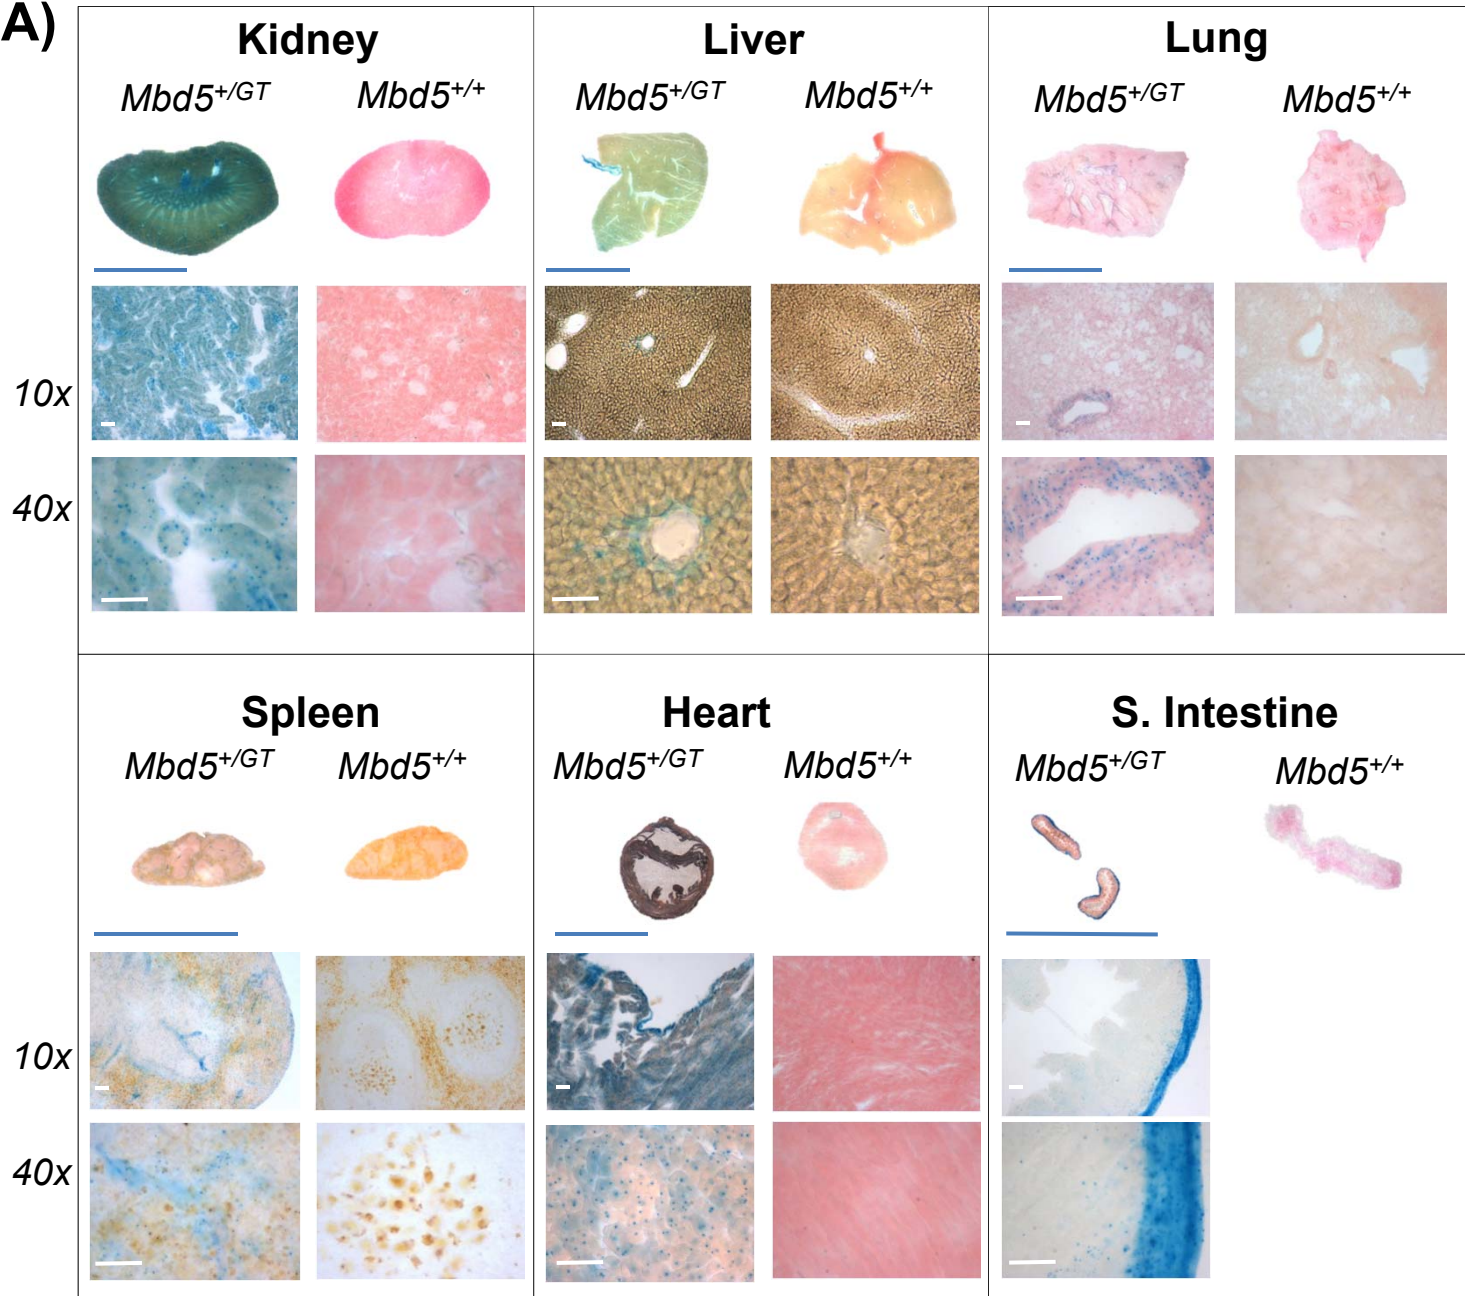

**B)**

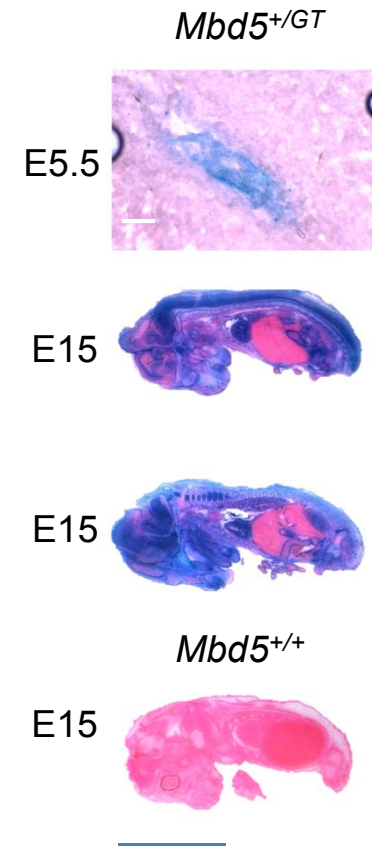

Fig S3

A)

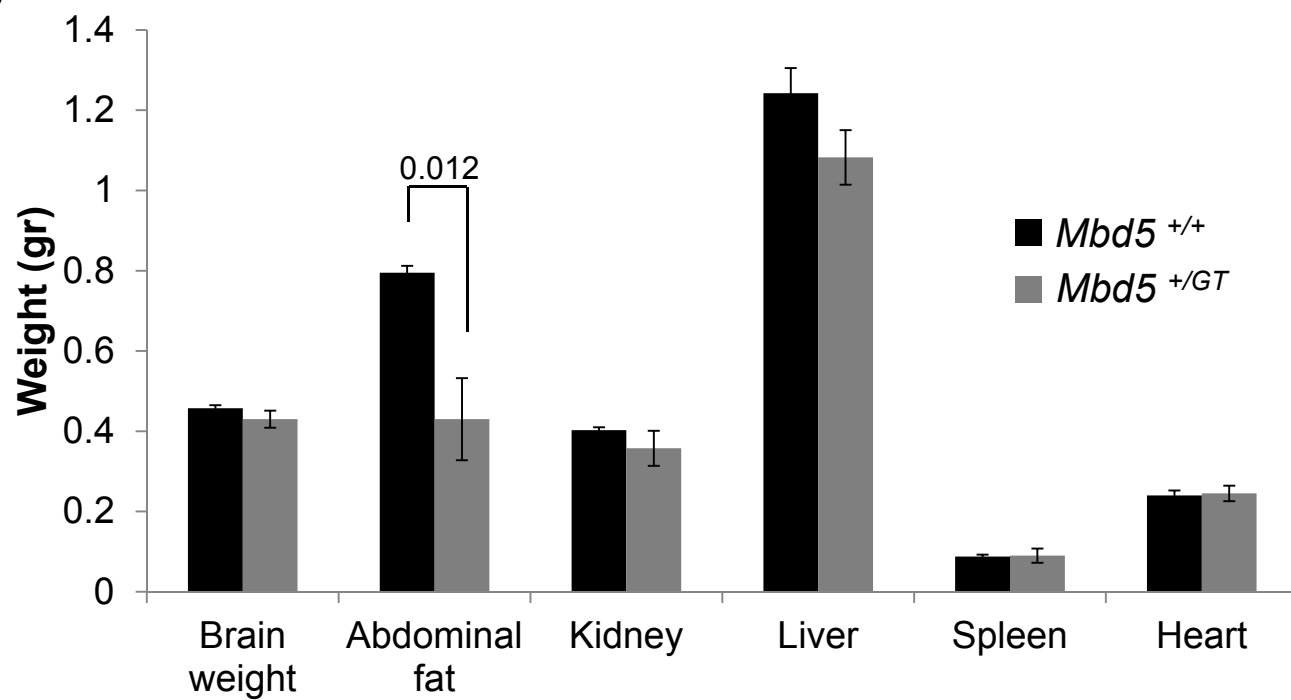

B)

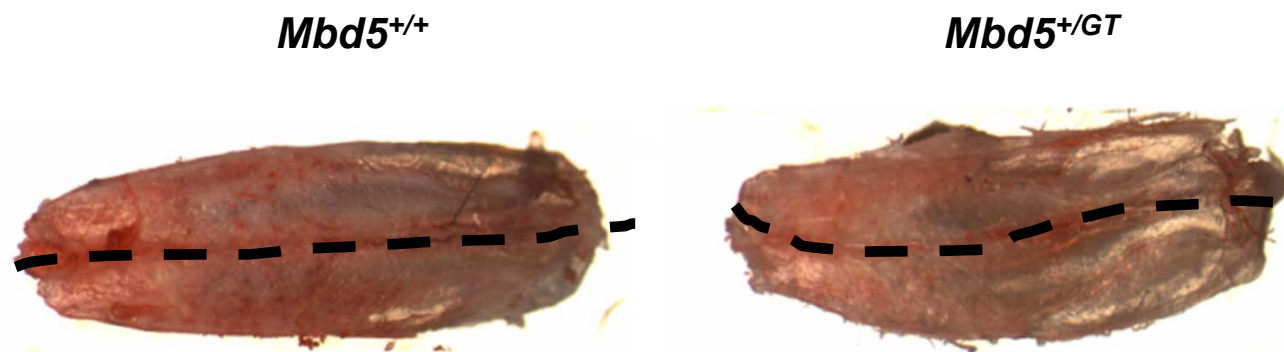

**Fig S4**

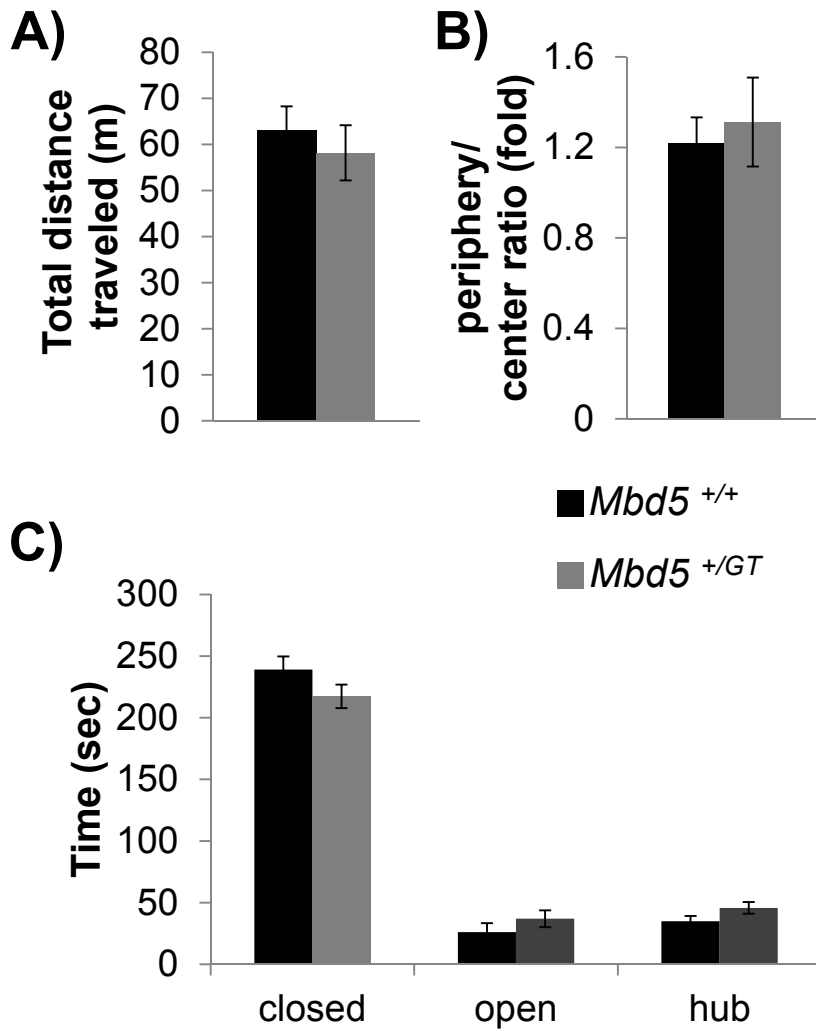

**Fig S5**

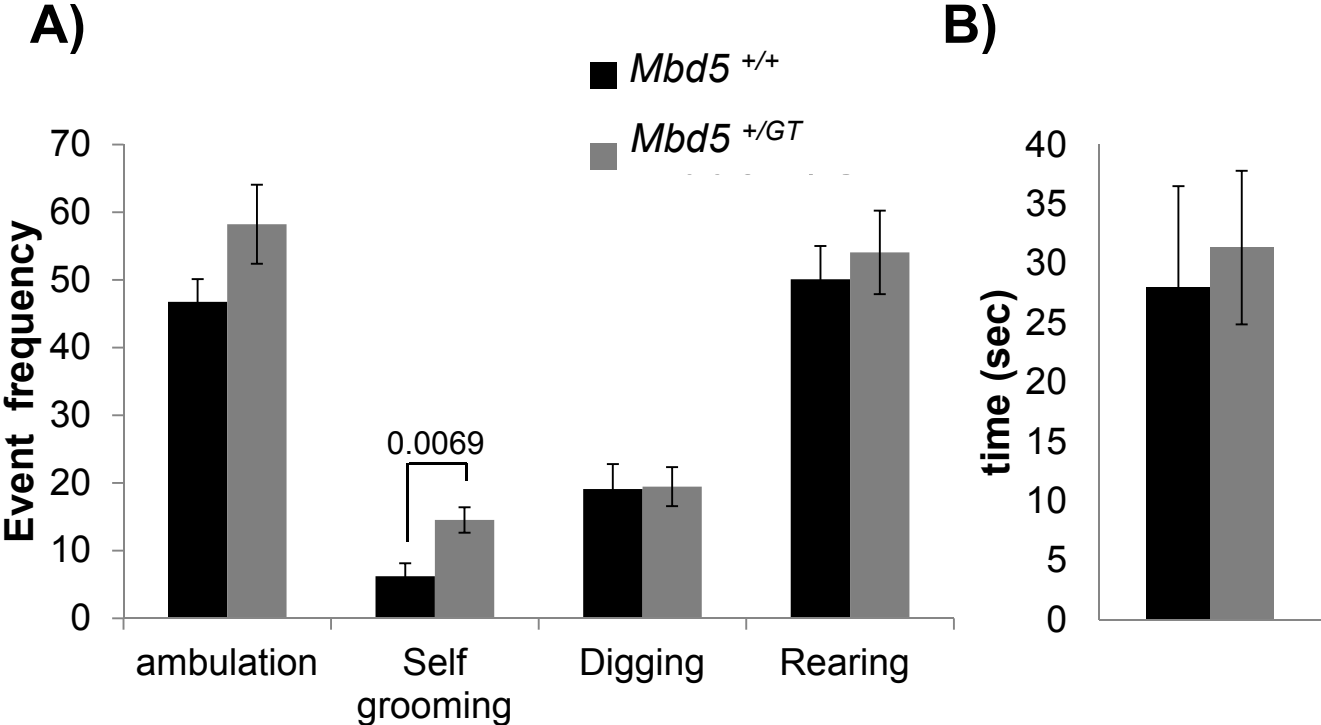

Fig S6

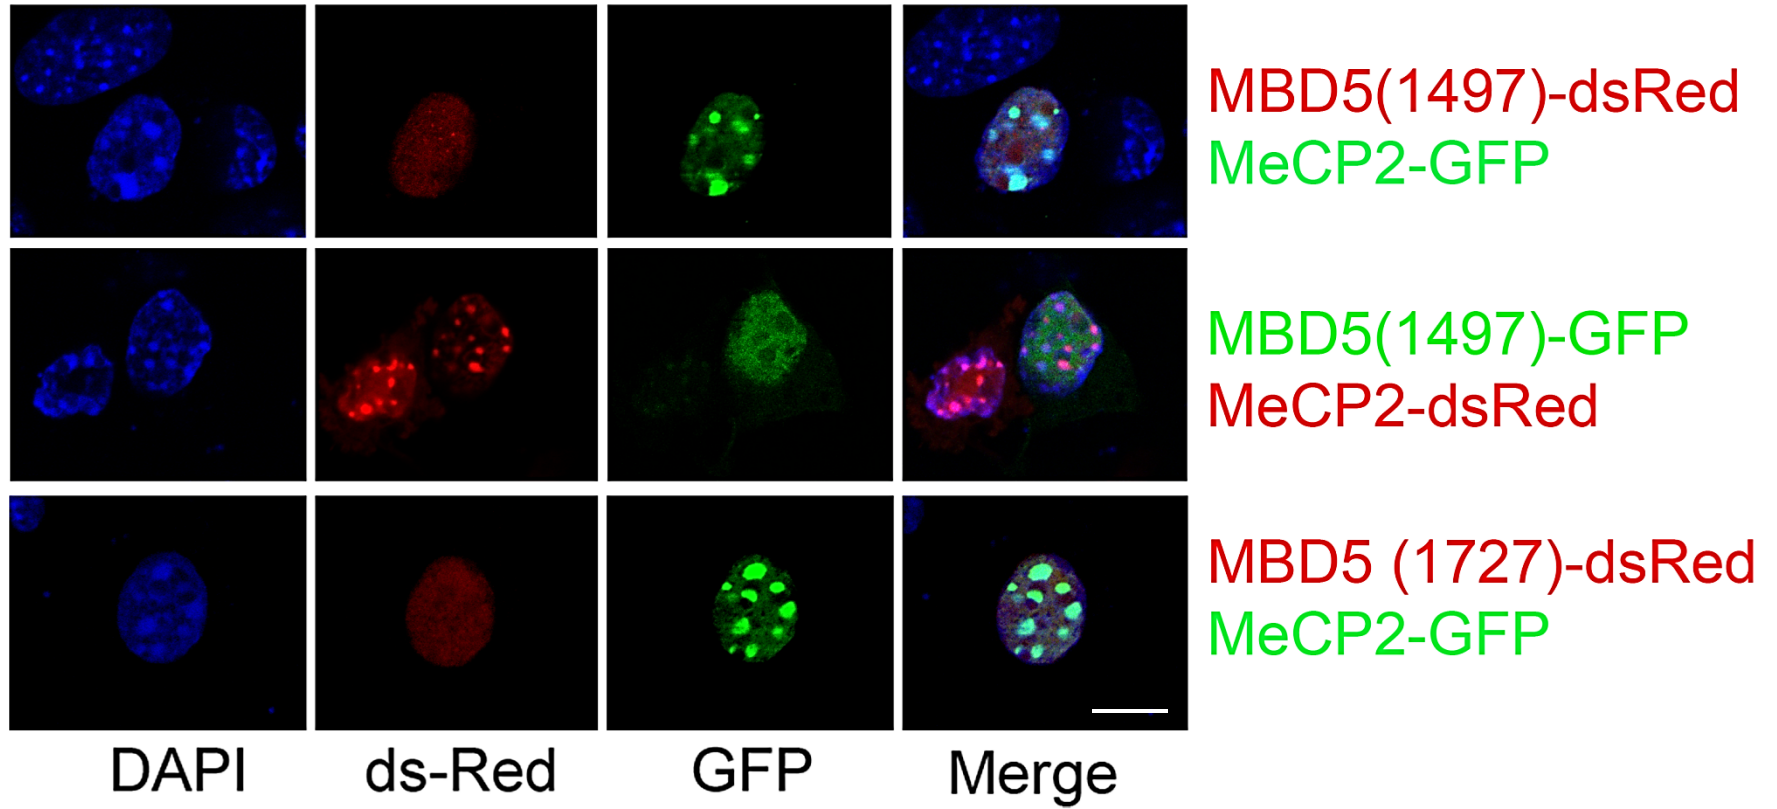

## Supplemental Table 1

| Primer name | Primer sequence             |
|-------------|-----------------------------|
| GapdhF      | ACCCAGAAGACTGTGGATGG        |
| GapdhR      | CACATTGGGGGTAGGAACAC        |
| Gsk3bF      | TGGCAGCAAGGTAACCACAG        |
| Gsk3bR      | CGGTTCTTAAATCGCTTGTCTG      |
| Sgk1F       | CGCCAAGTCCCTCTCAACAA        |
| Sgk1R       | TGCCCTTTCCGATCACTTTC        |
| c-fosF      | ACCATGATGTTCTCGGGTTTCAA     |
| c-fosR      | GCTGGTGGAGATGGCTGTCAC       |
| Tet2F       | GCTGAGCCAAAAGAGGAAGAG       |
| Tet2R       | TGAGGGTGACCACCACTGTA        |
| CrebF       | TCAGCCGGGTACTACCATTTC       |
| CrebR       | TTCAGCAGGCTGTGTAGGAA        |
| BdnfF       | CATATCGGCCACCAAAGACT        |
| BdnfR       | GTCCGCACACCTGGGTAG          |
| ArcF        | AGCAGCAGACCTGACATCCT        |
| ArcR        | GGTGTCAATTCTCCTGGCTCT       |
| Mbd5 p2     | TCGGATCCTAACTAAATCAAAATG    |
| Mbd5 pT     | GTAATGGGATAGGTTACGTTGGTGTAG |
| Mbd5 p4     | CACCACACAGCCTGCAATAG        |
| Mbd5 p13F   | TCTCCAGGGACACCAGAATC        |
| Mbd5 p15R   | GCGGCTGTAGGCTTCTAAAC        |
| Orc4F       | GCACATGCAGAGTGTCTTTCA       |
| Orc4R       | TTTTCACTCACTTCTATTTCCATGA   |
| Mbd5 p10F   | CAGTCCTGGAGGAGGAACAA        |
| Mbd5 p11R   | TTCACAATGGGGAAAGGAAC        |
| Mbd5 p12F*  | GGCAGCACTGACTGTCTCAA        |
| Mbd5 p12F   | TCAACAGCATCTCCTAAACCAG      |
| Mbd5 p13R   | TGCTGATTTGGAGGAAACATC       |



## Supplemental figure legends

**Figure S1. The  $\beta$  geo gene-trap cassette from pU-21B vector was inserted into the second intron of *Mbd5*:** Schematic of the *Mbd5* gene with the insertion of the  $\beta$  geo gene-trap cassette. Numbers correspond to the exons of *Mbd5*. Sequence from the 5'-inverse PCR product from the gene trap allele is in the box. Vector integration site was determined by BLAT search of the 5'-inverse PCR sequence using the UCSC genome browser.

**Figure S2. Pattern of expression of mouse *Mbd5*.** 30  $\mu$ m cryostat sections from (a) 1 month old mice kidney, liver, lung, spleen, heart and small intestine and (b) from whole mount mouse embryos at E5.5 and E15 from *Mbd5*<sup>+/+</sup> and *Mbd5*<sup>+/GT</sup> male mice were processed for X-gal staining. Transmittance images of magnified regions are shown. (n=2 *Mbd5*<sup>+/+</sup>, n=4 *Mbd5*<sup>+/GT</sup>). White scale bar: 40 $\mu$ m; Blue scale bar: 5mm.

**Figure S3. Reduced abdominal fat and nasal bone deformation in *Mbd5*<sup>+/GT</sup> mice.** (a) Average weight of the brain, abdominal fat, kidney, liver, spleen and heart of male *Mbd5*<sup>+/+</sup> and *Mbd5*<sup>+/GT</sup> mice measured at 4 months of age (4 *Mbd5*<sup>+/+</sup> and 4 *Mbd5*<sup>+/GT</sup>; Student's T test; unpaired, 2 tailed distribution, p values are displayed above the bars in the figure). (b) Top view of the dissected nasal bone of male *Mbd5*<sup>+/+</sup> and *Mbd5*<sup>+/GT</sup> mice at 1 month of age. The intermittent line highlights the curvature of the midline and the lack of symmetry in nasal bones of *Mbd5*<sup>+/GT</sup> mice.

**Figure S4. *Mbd5*<sup>+/*GT*</sup> mice have normal locomotor activity and anxiety-like behavior.** (a) Locomotor activity measured in the open field do not show significant difference between *Mbd5*<sup>+/*+*</sup> and *Mbd5*<sup>+/*GT*</sup> male mice, (b) the periphery/center distance ratio in the open field and (c) the time spent in open arm of the elevated plus maze are indicators of anxiety-like behavior and do not show any significant difference between *Mbd5*<sup>+/*+*</sup> and *Mbd5*<sup>+/*GT*</sup> male mice (Student's T test, unpaired, 2 tailed distribution, p values are displayed above the bars in the figure, n= 9 *Mbd5*<sup>+/*+*</sup> and 16 *Mbd5*<sup>+/*GT*</sup>, 9 weeks old mice).

**Figure S5. Increased frequency of self-grooming and normal olfaction in *Mbd5*<sup>+/*GT*</sup> mice.** (a) Evaluation of frequency of activities of unperturbed male mice observed over 10 min in their own cage. Bars represent frequency of the events of the indicated activity. Age of mice was 3 months. (n=9 *Mbd5*<sup>+/*+*</sup> and 14 *Mbd5*<sup>+/*GT*</sup>, Mann-Whitney U test, p values are displayed above the bars in the figure) (b) the time required to find a hidden food pellet in *Mbd5*<sup>+/*+*</sup> and *Mbd5*<sup>+/*GT*</sup> was the same in the odor test.

**Figure S6. Localization of transfected *Mbd5* in mouse NIH-3T3 cells.** *Mbd5* and the heterochromatic marker MeCP2 fused to GFP or dsRed at the N-terminus were transfected into NIH-3T3 cells. DAPI was used for nuclei acid staining (blue). The images were taken with a confocal LSM 710 microscope from Zeiss. Scale Bar = 10µm.

**Supplementary Table 1. Sequences of the primers used in the manuscript.**
